# Supplementary material for: Development of a sequential tool, LMDZ-NEMO-med-V1, to conduct global to regional past climate simulation for the Mediterranean basin: An Early Holocene case study
Source: Copernicus journal article supplement (doi:10.5194/gmd-2019-196), 2019-08-30
Supplement: Supplementary file 1 [file gmd-2019-196-supplement.pdf]

**Development of a sequential tool, LMDZ-NEMO-med-V1,  
to conduct global to regional past climate simulation for  
the Mediterranean basin: an Early Holocene case study**

Tristan Vadsaria<sup>1</sup>, Laurent Li<sup>2</sup>, Gilles Ramstein<sup>1</sup> and Jean-Claude Dutay<sup>1</sup>

<sup>1</sup>Laboratoire des Sciences du Climats et de l'Environnement, CEA-CNRS- Université Paris Saclay, Gif-sur-Yvette, 91191, France

<sup>2</sup>Laboratoire de Météorologie Dynamique, CNRS-ENS-Ecole polytechnique- Sorbonne Université, Paris, 75005, France

*Correspondence to:* Tristan Vadsaria (tristan.vadsaria@lsce.ipsl.fr)

The supplementary material includes:

- **Supplementary text**

**Text S1:** LMDZ-NEMO-med, user manual

**Text S2:** Bias correction

**Text S2:** Comparison of model simulation outputs with reconstructed data for the whole Mediterranean basin

- **Supplementary figures**

**Fig. S1.** Comparison of model with data for continental precipitation

**Fig. S2.** Comparison of model with data for SST

**Fig. S3.** Comparison of model with data for SSS

**Fig. S4.** Interannual evolution of the IS over the Mediterranean Sea in the HIST simulation

**Fig. S5.** Interannual evolution of the ZOF in the eastern Mediterranean Sea in the HIST simulation

**Fig. S6.** Interannual evolution of the IS over the Mediterranean Sea in the PICTRL and EHOL simulations

**Fig. S7.** Interannual evolution of the ZOF in the eastern Mediterranean Sea in the PICTRL and EHOL simulations

- **Supplementary tables**

**Tab. S1.** Forcings and parameters used in both AGCM and ARCM

**Tab. S2.** Forcings used in the ORCM

**Text S1:** LMDZ-NEMO-med, user manual

35

36 This section is intended as a user manual to provide an explanation on how to compile and run LMDZ-  
37 NEMO-med on a Linux system. It is not, however, a detailed description of the source code. Files  
38 relevant to the running of the pre-industrial control simulation presented in the article have been  
39 archived and made publicly available for downloading: <https://zenodo.org/record/3258410> (Vadsaria  
40 et al., 2019).

41

## 42 1 Atmospheric global model

43 LMDz4, used here in both the global and regional versions, is version 4 of the LMDZ model. It has the  
44 same major code structure and practical organisation as the last version, consultable on the web page:  
45 [https://forge.ipsl.jussieu.fr/igcmg\\_doc/wiki/DocImodelBlmdz](https://forge.ipsl.jussieu.fr/igcmg_doc/wiki/DocImodelBlmdz)

46

### 47 1.1 Compiling the model

48 The compiling environment is MODIPSL, a convention for code compilation when the code is  
49 distributed into different directories. The following directory should be consulted:

50

51 **“cd vadsaria\_et\_al\_model/LMDZ\_and\_NEMOMED8\_models/modipsl/util”**

52

53 **Edit the “AA\_make.gdef”**: the users should create a new entry to fit its computational architecture.  
54 Compiler options have been set up in this file and will be propagated to “Makefile” at different places.

55

56 It is recommended that all previous configurations be cleared by typing **“./clr\_make”**. A new  
57 configuration to match the right computer platform can then be created:

58

59 **“./ins\_make -t NAME\_OF\_YOUR\_ARCHITECTURE\_SYSTEM”**

60

61 Before code compilation, netcdf and Fortran compiler need to be installed. FCM (Flexible  
62 Configuration Management: <https://metomi.github.io/fcm/doc/>), a tool developed by the UK Met  
63 Office to manage the dependence between different subroutines of a complex code is also required.  
64 Compiling options for FCM are stored under “machine/arch.path” and “machine/arch.fcm”. They need  
65 to be coherent with what stored under “AA\_make.gdef” and “Makefile”.

66 To compile the code, the following directory needs to be consulted:

67

68 **“cd vadsaria\_et\_al\_model/LMDZ\_and\_NEMOMED8\_models/modipsl/config/LMDZ”**

69

70 Then, with the help of “Makefile”, the following can be compiled:

71

72 **“gmake lmdz96x71global”**

73

74 **“lmdz96x71global”** is a keyword found in the **“AA\_make”** script allowing a configuration to be  
75 chosen.

76 If the compilation is successful, then the executable codes **“create\_etat0\_limit.e”**,  
77 **“make\_relax\_times.e”** and **“gcm.e”** are stocked at the following directory:

78 **“cd vadsaria\_et\_al\_model/LMDZ\_and\_NEMOMED8\_models/modipsl/modipsl/bin”**

79

80 1.2 Running the model

81

82 The first step is the creation of boundary conditions for the global atmospheric model. The files  
83 needed for this step can be found here:

84

85 **“cd vadsaria\_et\_al\_model/files\_and\_boundary\_conditions\_for\_LMDZ\_global/start\_limit”**

86

87 A boundary condition file is already provided in this directory: **“limit\_picontrol\_debiais.nc”**. It is  
88 based on a bias-corrected file for SST and SIC data (following the procedure described in the main  
89 article) derived from the IPSLCM5 simulation for the pre-industrial simulation. The procedure to  
90 generate this boundary condition file is the following:

91 - Prepare a netcdf file with SST and SIC bias-corrected data, interpolated on a  $1^\circ \times 1^\circ$  grid: **“CM5-  
92 piControl-pseudo\_amip\_1x1\_tos\_sic.3600-3699\_climato.after\_correction.nc”** (in the sub-  
93 directory **“/interpol”**, a code to generate a  $1^\circ \times 1^\circ$  **“AMIP”** grid is provided :  
94 **“interpol\_ipslcm5\_amip\_tos\_sic.F90”**)

95

96 - Create symbolic links:

97

98 **“ln -s CM5-piControl-pseudo\_amip\_1x1\_tos\_sic.3600-3699\_climato.after\_correction.nc  
99 amipbc\_sic\_1x1.nc”**

100

101 **“ln -s CM5-piControl-pseudo\_amip\_1x1\_tos\_sic.3600-3699\_climato.after\_correction.nc  
102 amipbc\_sst\_1x1.nc”**

103

104 - Move the file obtained from the previous compilation of the model to the current directory and  
105 execute:

106

107 **“./create\_etat0\_limit.e”**

108

109 This execution is based on a few “.nc” files containing information on topography, surface albedo, etc.  
110 It also takes relevant information from definition files of the model (gcm.def, physic.def and  
111 orchidee.def. More information can be found by following the link mentioned at the head of the  
112 section). It should create a “**limit.nc**” file.

113 After creating the initial states and boundary conditions, we are now ready to run the model with an  
114 example from the following directory

115

116 “**cd vadsaria\_et\_al\_model/files\_and\_boundary\_conditions\_for\_LMDZ\_global**”

117

118 The bash script “**launch\_picontrol\_run\_global\_type**” is an example of how to run the atmospheric  
119 global model. The script firstly organises files for boundary conditions and initial state (all presented  
120 in the current directory), and then executes the model “**gem.e**” to generate outputs. This script was  
121 initially created for use in the supercomputing centre, TGCC, so instructions for the management of  
122 environmental variables, including the necessary pathways for the model’s preferences  
123 and allocation of computing resources, are available. The script is executed with a time step of one  
124 month.

125

126 To start the execution of the model:

127

128 **./launch\_picontrol\_run\_global\_make 1**

129

130 “1” being the first month. It will create the **launch\_picontrol\_run\_global\_launcher** bash file. The  
131 user should then execute this file according to its system. If the script works, it will automatically  
132 generate the next iteration (the next month) until the maximum iteration is reached, denoted as the  
133 “**stop**” variable in the “**launch\_picontrol\_run\_global\_type**” file, set here at 360 months (30 years).

134

135 2 Atmospheric regional model

136

137

138 2.1 Compiling the model

139

140 The code of this model is identical to that of the global version, but in “Makefile”, the key word  
141 should be changed from “lmdz96x71global” to “lmdz200120\_oneway”

142

143 Go to the following directory:

144

145 **“cd vadsaria\_et\_al\_model/LMDZ\_and\_NEMOMED8\_models/modipsl/config/LMDZ”**

146

147 Then compile the Makefile:

148

149 **gmake lmdz200120\_oneyway**

150

151 **“lmdz200120\_oneyway”** is a keyword found in the **“AA\_make”** script allowing a configuration to be  
152 chosen.

153 If the compilation is successful, executable files found in the following directory can be applied:

154 **“cd vadsaria\_et\_al\_model/LMDZ\_and\_NEMOMED8\_models/modipsl/modipsl/bin”**

155

156 2.2 Running the model

157

158 The first step is to create the boundary conditions for the regional atmospheric model. A boundary  
159 condition file, **“limit\_picontrol\_debiais.nc”**, is already provided in the following  
160 directory: **:/vadsaria\_et\_al\_model/files\_and\_boundary\_conditions\_for\_LMDZ\_regional/start\_limit**

161 It is of course different from that of the global model, but it is also obtained from a bias-corrected file  
162 of SST and SIC data, derived from the IPSLCM5 global coupled model for the pre-industrial  
163 simulation. The procedure to generate this boundary condition file is the same as described for the  
164 global version.

165 To run the model, an example is given in the following directory

166

167 **“cd vadsaria\_et\_al\_model/files\_and\_boundary\_conditions\_for\_LMDZ\_regional”**

168

169 The example bash script **“launch\_picontrol\_run\_regional\_type”** shows how to run the atmospheric  
170 regional model. Unlike the global model, additional files are needed to nudge the regional model with  
171 the global output. **“biline\_poids\_s.nc”**, **“biline\_poids\_u.nc”** and **“biline\_poids\_v.nc”** (presented in  
172 the current directory) are interpolation files allowing efficient transformation of global variables for  
173 the regional model grid. Nudged forcing, with a 3-hour time step, from the global model is stored in  
174 **“sortie\_histfrq.nc”**.

175 Since the global and regional models share a common structure, their launch is also very similar,  
176 although with different configuration files.

177

178 3 Mediterranean oceanic model

179

180 NEMOMED8 is the Mediterranean regional version of the NEMO model. Documentation on the latest  
181 version of the model can be found here: <http://forge.ipsl.jussieu.fr/nemo/wiki/Users>

182

### 183 3.1 Compiling the model

184

185 The compilation of NEMOMED8 is managed entirely through MODIPSL, so the generation of  
186 Makefile is the same as described earlier for LMDZ. The keyword to be used in the argument of  
187 “gmake” is “nemomed8”. The compilation procedure is simply the following:

188

```
189 “cd vadsaria_et_al_model/LMDZ_and_NEMOMED8_models/modipsl/config/NEMOMED8”
```

190

```
191 “gmake nemomed8”
```

192

```
193 “cd vadsaria_et_al_model/LMDZ_and_NEMOMED8_models/modipsl/modipsl/bin”
```

194

195 If the compilation is successful, then it creates the executable file, “opa”. In our study, NEMOMED8  
196 is compiled to run with 121 cores in parallel mode.

197

### 198 3.2 Running the model

199

200 Before running the model, the 3D boundary conditions for salinity and potential temperature over the  
201 buffer zone in the Atlantic close to the Gibraltar need to be generated. This operation is conducted in  
202 the following directory:

203

```
204 “cd vadsaria_et_al_model/files_and_boundary_conditions_for_NEMOMED8”
```

205

206 These boundary conditions are found in the files  
207 “data\_1m\_potential\_temperature\_nomask\_picontrol\_debiais\_climato.nc” and  
208 “data\_1m\_salinity\_nomask\_picontrol\_debiais\_climato.nc”, bias-corrected from the IPSLCM5 pre-  
209 industrial simulation. The grid of the NEMOMED8 model (“meshmask\_med8.nc”) is provided  
210 allowing the user to interpolate their own boundary conditions from this grid.

211

212 The second step is to generate the surface fluxes from the atmospheric regional model. For this  
213 purpose, a bilinear interpolation is used to convert the LMDz4 air-sea fluxes into the NEMOMED8  
214 grid. For this purpose, an interpolation is used to convert the LMDz4 air-sea fluxes into the  
215 NEMOMED8 grid (bilinear for wind stress and conservative remapping for other fluxes). For  
216 NEMOMED8, the water, radiative, latent, sensible fluxes and wind stress are required. In the sub-  
217 directory “/lmdz\_to\_nemo”, a code is provided to generate the bilinear interpolation scheme:  
218 “interpol\_between\_lmdz\_et\_nemo.F90”. During the execution of the executable file, a weight file is  
219 required (“opalmdmo”, also provided in the sub-directory).

220  
221  
222  
223  
224  
225  
226  
227  
228  
229  
230  
231  
232  
233  
234  
235  
236  
237  
238  
239  
240  
241  
242  
243  
244  
245  
246  
247  
248  
249  
250  
251  
252  
253

“sst\_picontrol\_debiais.nc.000101”,  
“flx\_picontrol\_debiais.nc.000101”,  
“taux\_picontrol\_debiais.nc.000101” and  
“tauy\_picontrol\_debiais.nc.000101”.

Finally, the bash script “**launch\_picontrol\_run\_mediterranean\_ocean\_type**” is an example of the instructions necessary to run the oceanic regional model. The procedure is similar to the global and regional atmospheric model.

## **Text S2: Bias correction**

The bias correction for our experiments driven by IPSL simulations is illustrated. IPSL-CM5A is a fully coupled climate system model. It operates autonomously for either present-day climate, future climate scenarios, or paleo climate reconstructions, depending on the external forcings or boundary conditions imposed on it. For its historical simulation of modern climate (from 1850 to 2005), we point out a few general biases that need to be corrected before running our regional system for paleo periods (Early Holocene). Below, the correction method for the oceanic 3-D structures: SST and SIC; as well as, the freshwater discharges from rivers, is described.

### *SST and SIC global fields*

*The global fields* of SST and SIC are the most important variables in our methodology since they contain the main climate change information to be transferred from the global scale to the regional scale. They are used to force both the AGCM and the ARCM. SST has a cold bias globally that has a strong impact on the Mediterranean Sea and the nearby Atlantic region. To remove this bias, we simply applied an offset based on the difference between the IPSL-CM5A historical simulation and the ERA-Interim reanalysis (Dee et al., 2011) for the period 1970-1999.

IPSL-CM5A, on the other hand, tends to overestimate temperatures at the poles, which leads to an underestimation of the SIC. This bias affects the surface albedo and the global energy budget. It also affects the meridional temperature gradient and consequently the mid-latitude atmospheric eddies. The bias correction used for SIC is the analogue method presented in Beaumet et al., (2017). The basic idea is to adjust the total areas covered by sea ice for each hemisphere and for each month following the geographic and temporal biases. As with the previous corrections for SST, the hemispheric and monthly bias correction for SIC is based on the difference between IPSL simulations and observed SIC (Climatological monthly mean for 1970-1999 from ERA-Interim). Finally, the geographic distribution

254 of SIC is determined by hemisphere and by month following an analogue relationship extracted to match  
255 observations from 1970 to 2012.

### 256 *3D temperatures and salinities in the buffer-zone*

257 The 3-D fields of oceanic temperature and salinity (over the whole water column) in the Atlantic buffer  
258 zone has been adjusted in the same way as for SST. We used the World Ocean Atlas (WOA) (Locarnini  
259 et al., 2013) as a reference to correct the outputs from the IPSL-CM5A historical simulation.

### 260 *River runoff to the Mediterranean Sea*

261 Freshwater discharge from rivers around the Mediterranean Sea is an important factor controlling the  
262 overturning circulation of the Mediterranean. Due to the high sensitivity of oceanic circulation to this  
263 variable, we decided to apply a correction based on Ludwig (Climatology 2009) modified using  
264 simulated precipitation anomalies between Early Holocene and present day. Since the atmospheric  
265 model (LMDZ4, and especially the regional configuration, LMDZ4-regional), coupled to the land  
266 surface model, ORCHIDEE, tends to overestimate the amount of freshwater runoff in LMDZ4 compared  
267 to present-day observations, we applied a bias-correction with observed climatological runoff. When  
268 the difference is not significant, the corrected runoff is set to the climatology, mainly to avoid negative  
269 values<sup>1</sup>. However, in order to stay consistent with the methodology for SST and SIC bias correction, we  
270 chose the absolute difference correction method for the river runoff. This correction is based on the  
271 monthly difference between LMDZ4 runoff and climatology (Ludwig et al., 2009; Vorosmarty et al.,  
272 1998).

273

## 274 **Text S3: Comparison of model simulation outputs and reconstructed data for the Mediterranean** 275 **basin**

### 276 *Continental precipitation*

277 The reconstructed data used for the comparison with the EHOL simulation is taken from Dormoy et al.,  
278 (2009) for the Aegean Sea, from Peyron et al., (2011) for the Lake Accesa and from Tenaghi Philippon,  
279 and Magny et al., (2013) for Lake Pergusa. In these studies, continental precipitation is reconstructed  
280 based on pollen sequences to emphasis the changes in precipitation seasonality. Several methods are  
281 used to determine these changes. We chose to reconstruct these changes using the Modern Analogue  
282 Technique (MAT, Guiot, 1990), because, in their study, Magny et al. compared their data to Peyron et  
283 al's MAT. We extracted data values framing a few hundred years around 9.5 ka cal BP, because the

---

<sup>1</sup> Namely, when the difference does not exceed 25%, of the annually average annual difference for the Nile river runoff (due to the simulated amplitude, cf section 4.4) and 5% for the rest of the rivers.



284 orbital parameters of our atmospheric simulations (both global and regional) were set as they were  
285 during this period. For the Northern Sahara, data are based on  $\delta^{18}\text{O}$  from Bar-Matthews et al., (2003).

286 Comparison between model outputs and data in terms of annual and seasonality changes can be  
287 conducted and anomalies against modern values can be shown. In winter, the model shows positive  
288 precipitation anomalies for the four sites (Lake Accesa, model: +20-36 mm, data: +20-40mm, Tenaghi  
289 Philippon, model: +30-45 mm, data: +10-35 mm, Aegean, model: +29-45 mm, data: +10-80mm, Lake  
290 Pergusa, model: +7-26 mm, data: +35-60mm, figure 1, a d g i). In summer, the model shows a more  
291 contrasted response, with negative anomalies in summer temperatures (Figure 1, b e, h, j) due to the  
292 homogenous drought (fig 8d in the main article). However, this comparison cannot reflect the  
293 precipitation changes for the entire continent. Indeed, north of Lake Accesa we see positive summer  
294 anomalies (fig 8d in the main article). Our model underestimates precipitation over northern Sahara and  
295 northern Africa as do most Mid and Early Holocene simulations. As mentioned earlier, the LMDz model  
296 cannot reproduce the northward shift of the last African Humid Period, leading to an underestimate of  
297 precipitation.

298

### 299 *Sea Surface Temperatures*

300 We conducted a comparison of model output and data for SST as Adloff et al., (2011) did with the  
301 reconstruction of Kucera et al., (2011) (unpublished work). This reconstruction is based on census  
302 counts of foraminiferal species, and on the artificial neural network for the transfer function. The data  
303 used span the Holocene Insolation maximum interval (8.5 - 9.5 ka BP). Winter SST values (January to  
304 March) are a bit lower than the reconstruction figures especially for the Eastern basin (-1 to -2 °C). The  
305 simulated summer SSTs (July to September) are higher between the Tyrrhenian Sea and the Levantine  
306 Sea (+1 to +4 °C). This enhanced contrast between winter and summer values for simulated SST  
307 produced an annual signal in good agreement with the reconstructed values. Our results depict the same  
308 signal pattern as the simulations of Adloff et al., 2011, with some difference in the enhanced seasonal  
309 contrast.

310

### 311 *Sea Surface Salinities*

312 The comparison of SSSs over the Mediterranean Sea provides an appropriate indicator of freshwater  
313 perturbation induced by enhanced river flux. In order to perform the comparison, we used a synthesis  
314 (Kallel et al., 1997) of SSS values sampled from the S1 deposition. Our EHOL simulation takes the Nile  
315 river enhancement into account, 13000 m<sup>3</sup>/s annually (2930 m<sup>3</sup>/s, pre-industrial value), and the North-  
316 East river margin enhancement (Buyukmenderes, Vardar, Acheloos, Vjosa, Semanit, Shkumbin, Durres,  
317 Mat and Drini), for a total of 1622 m<sup>3</sup>/s annually and 3228 m<sup>3</sup>/s from February to May (1082/1619 m<sup>3</sup>/s

318 pre-industrial), inferred from the precipitation anomalies of the regional atmospheric model. Our EHOL  
 319 simulation, even using the strongest freshwater input, cannot reproduce a decrease in SSS sufficient to  
 320 match the reconstructed values, as shown in figure S3. This reflects the results of Adloff (2011). Indeed,  
 321 as demonstrated by Rohling (1999, 2000), this mismatch can be partly attributed to salinity  
 322 reconstruction. It is not always straightforward to interpret the isotopic composition of oxygen in terms  
 323 of salinity. Finally, it is likely that an additional non-negligible fresh water source is missing. To explain  
 324 the substantial SSS decrease, an additional source of freshwater associated with an amplification of the  
 325 flux of the North African rivers could potentially be superimposed on the Nile. Indeed, changes of this  
 326 type in the hydrology are clearly indicated by the data but are not reproduced in most of the Early and  
 327 Mid-Holocene simulations.

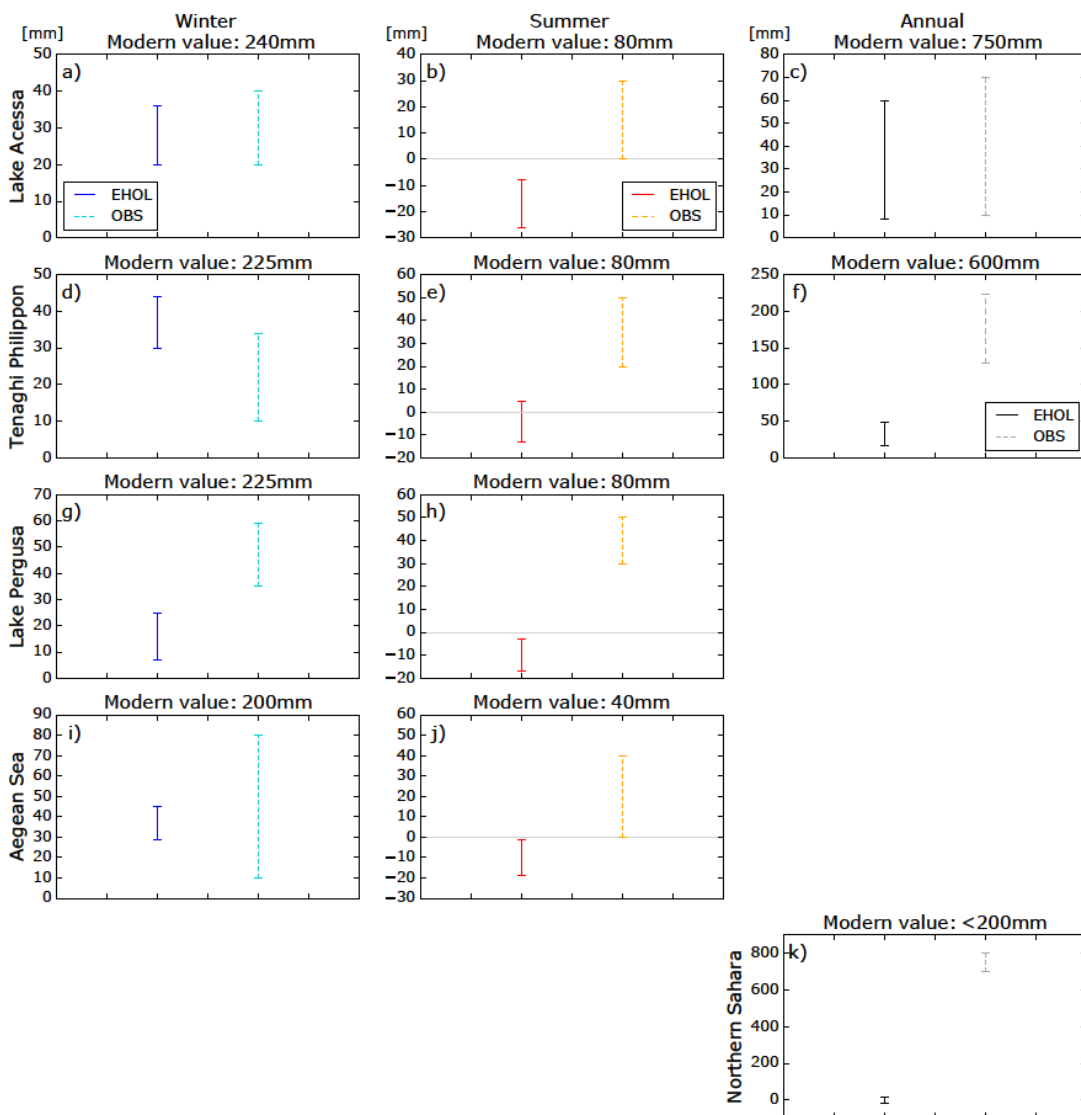

329 **Figure S1:** Model-data comparison for continental precipitation (solid lines = EHOL simulation, dashed  
 330 lines = pollen data reconstruction). First row: Lake Accessa (Northern Italy) (Peyron et al., 2011), Second  
 331 row: Tenaghi Philippon, (Greece) (Peyron et al., 2011), Third row: Lake Pergusa (Sicily), (Magny et  
 332 al., 2013), Fourth row: Aegean Sea, (Dormoy et al., 2009), Fifth row: Northern Sahara (Bar-Matthews  
 333 et al., 2003). First column: winter precipitation, Second column: summer precipitation, Third column:  
 334 annual precipitation.  
 335

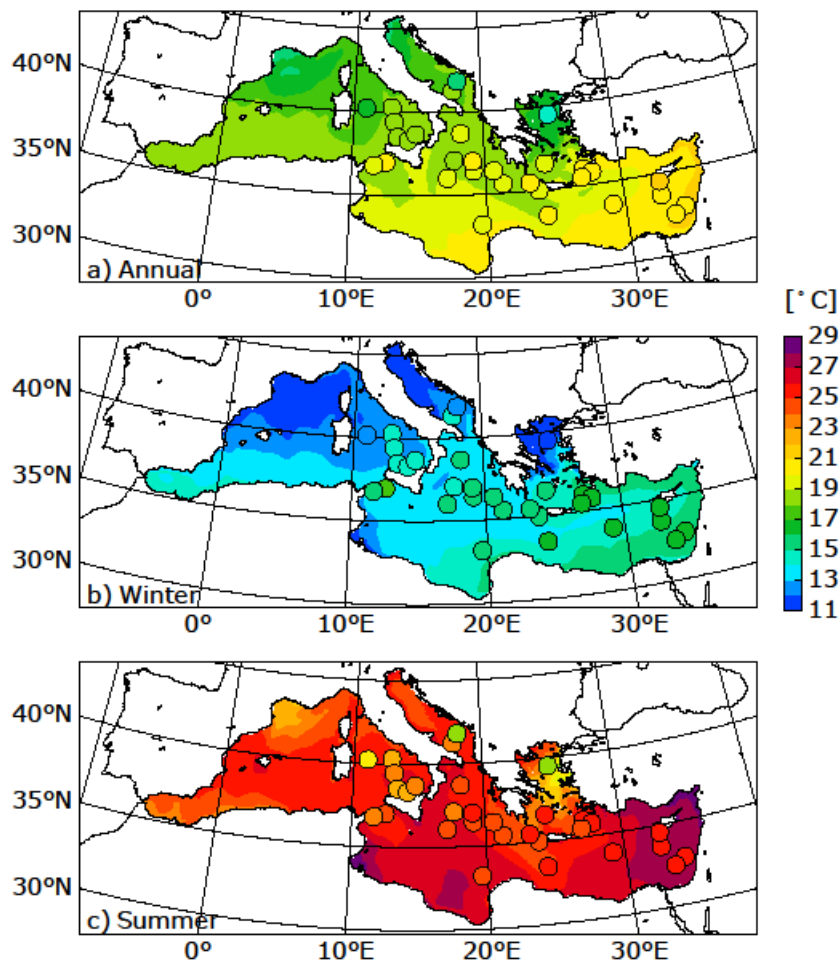

336  
 337 **Figure S2:** Model-data comparison for SST, adapted from Adloff (2011). Dots represent the  
 338 unpublished synthesis of Kucera et al. (2011), published in Adloff (2011). The background colour  
 339 represents the EHOL simulation.  
 340

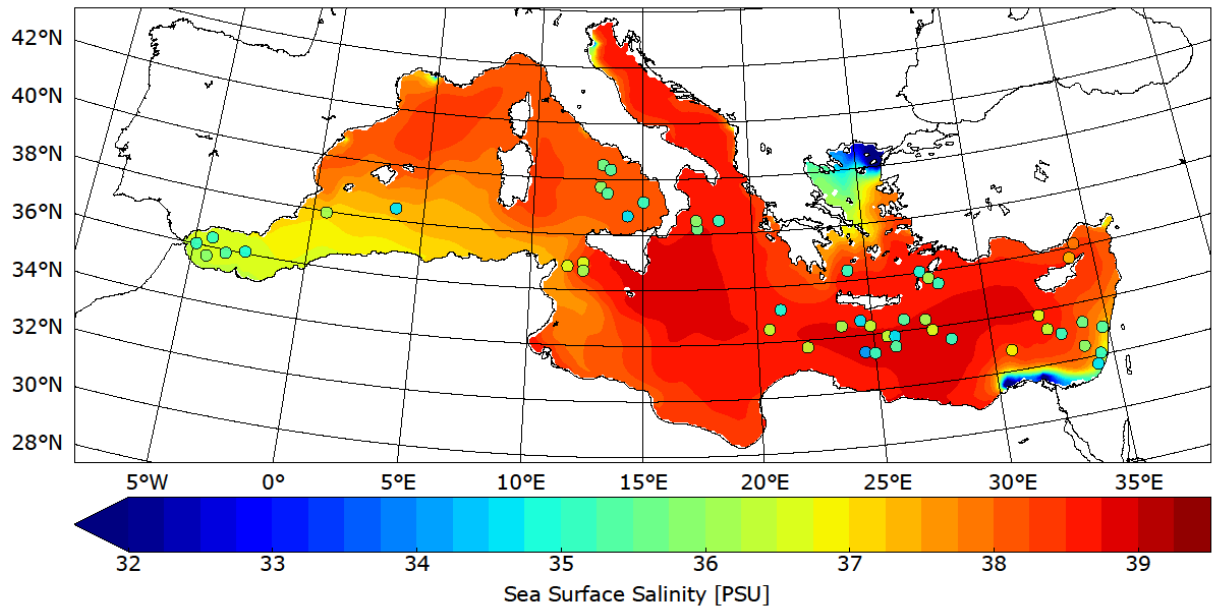

341  
 342 **Figure S3:** Model-data comparison for SSS. Dots represent the synthesis of Kallel et al. (1997a). The  
 343 background colour represents the EHOL simulation.  
 344

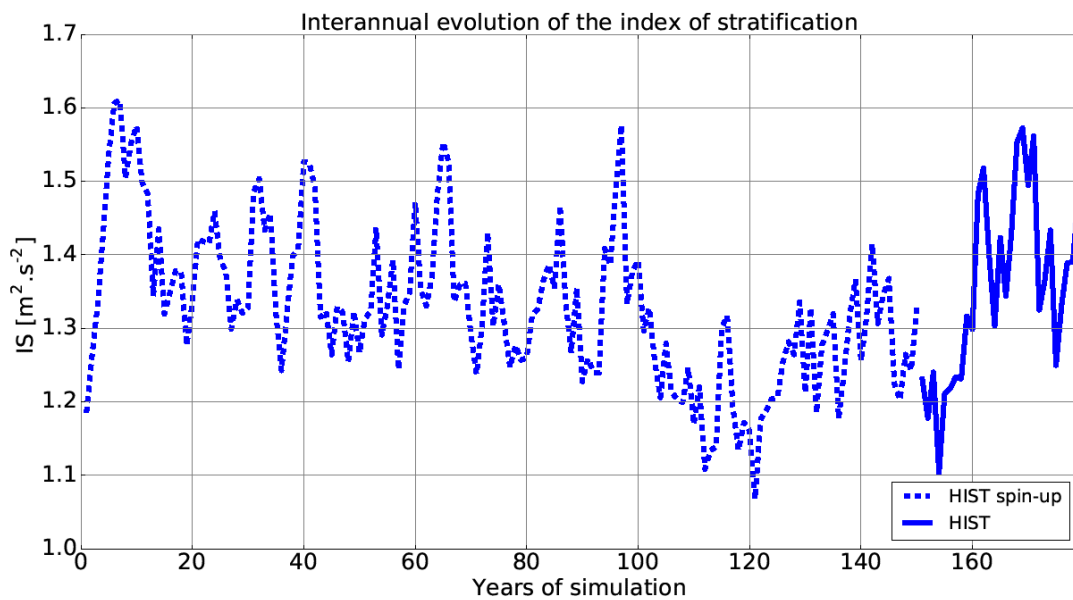

345  
 346 **Figure S4:** Interannual evolution of the index of stratification (IS) for the Mediterranean Sea for the  
 347 HIST simulation (including the spin-up phase).

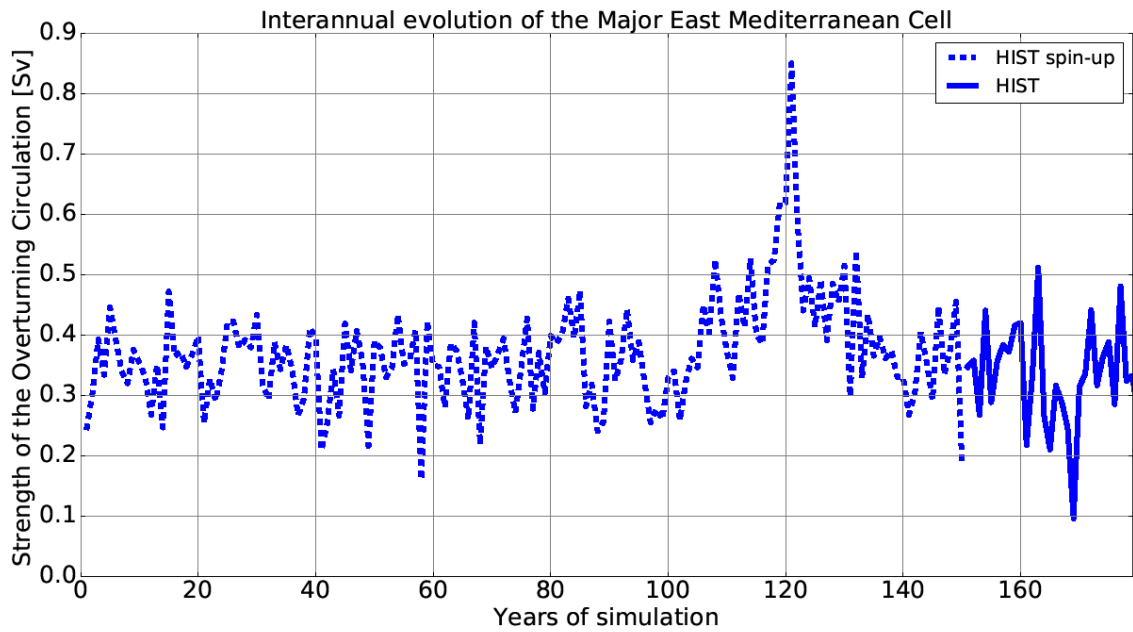

348

349 **Figure S5:** Interannual evolution of the Zonal overturning Stream Function (ZOF) in the eastern  
 350 Mediterranean Sea for the HIST simulation (including the spin-up phase).

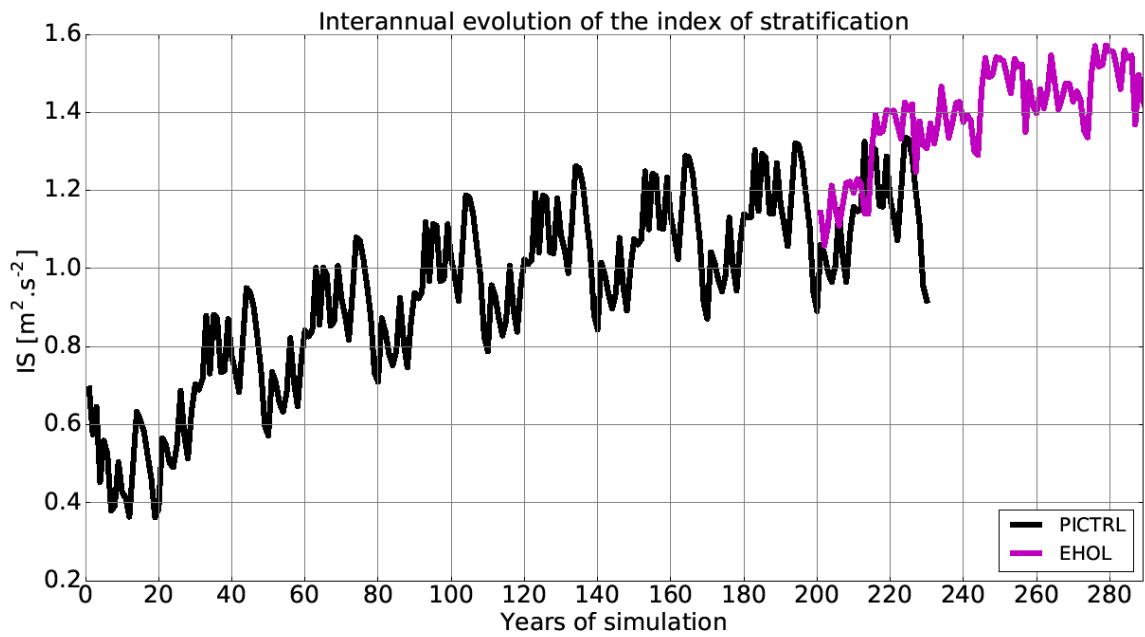

351

352 **Figure S6:** Interannual evolution of the index of stratification (IS) for the Mediterranean Sea for the  
 353 PICTRL and EHOL simulations (including the PTCRL spin-up phase).

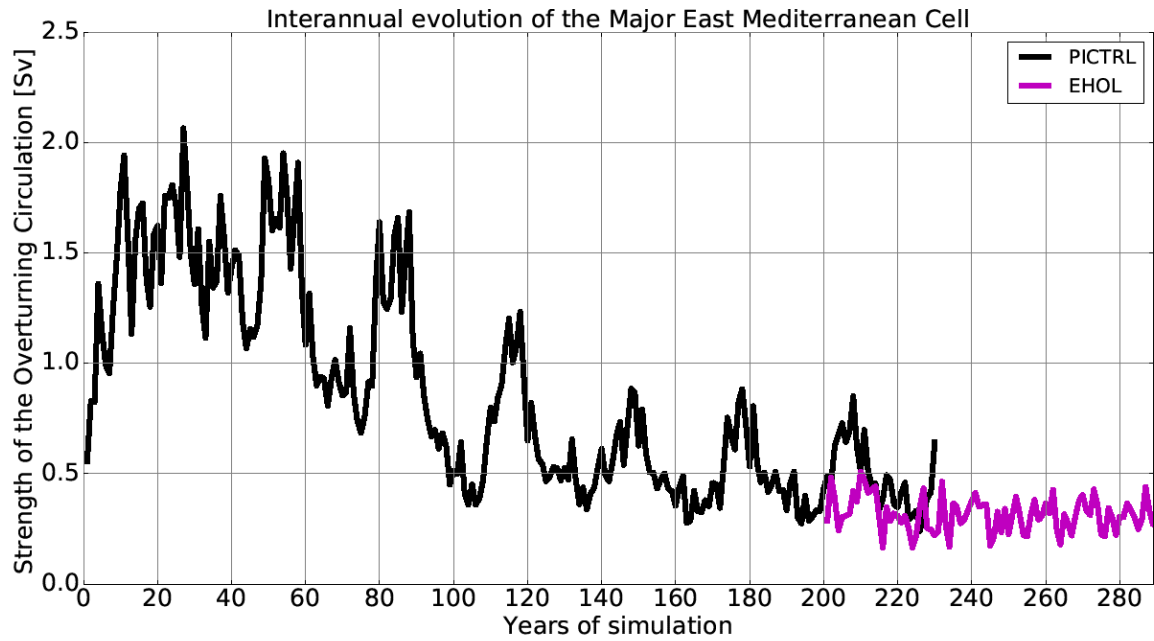

354

355 **Figure S7:** Interannual evolution of the Zonal overturning Stream Function (ZOF) in the eastern  
 356 Mediterranean Sea for the PICTRL and EHOL simulations (including the PICTRL spin-up phase).

357

358

|                    | HIST                                                         | PICTRL                               | EHOL                                                          |
|--------------------|--------------------------------------------------------------|--------------------------------------|---------------------------------------------------------------|
| Orbital parameters | $e = 0.01672$<br>$\epsilon = 23.44$<br>$\omega -180 = 102.7$ | Idem                                 | $e = 0.01935$<br>$\epsilon = 24.231$<br>$\omega -180 = 303.3$ |
| Atmospheric CO2    | Annual observed global mean (1970-1999)                      | 280 ppm                              | 280 ppm                                                       |
| SST forcing        | Era-Interim monthly forcing (1970-1999)                      | IPSL-CM5A picontrol + SST correction | IPSL-CM5A early Holocene + SST correction                     |
| SIC forcing        | Era-Interim monthly forcing (1970-1999)                      | IPSL-CM5A picontrol + SIC correction | IPSL-CM5A Early Holocene + SIC correction                     |

359

360

361

362  
363  
364  
365  
366  
367  
368  
369  
370  
371  
372  
373  
374  
375  
376

**Table S1:** Forcings and parameters used in both AGCM and ARCM.  $\epsilon$  is the elliptic orbit obliquity,  $e$ , the eccentricity and  $\omega$ , the longitude of the perihelion.

|                       | HIST                                 | PICTRL                                                    | EHOL                                                                                     |
|-----------------------|--------------------------------------|-----------------------------------------------------------|------------------------------------------------------------------------------------------|
| Buffer-zone T3D & S3D | WOA monthly forcing (1970-1999 mean) | IPSL-CM5A picontrol + T3D/S3D correction                  | IPSL-CM5A early Holocene + T3D/S3D correction                                            |
| River runoff          | Ludwig et al 2009, Rivdis database   | Ludwig et al 2009, Rivdis database (But Pre-damming Nile) | Anomalies inferred from EHOL – PICTRL atmospheric simulations (NILE + East-North margin) |

377  
378  
379  
380  
381  
382  
383

384  
385  
386  
387  
388  
389  
390

**Table 2:** Forcings used in the ORCM.

391 **References**

- 392 Adloff, F., Mikolajewicz, U., Kučera, M., Grimm, R., Maier-Reimer, E., Schmiedl, G. and Emeis, K.  
393 C.: Upper ocean climate of the Eastern Mediterranean Sea during the Holocene Insolation Maximum -  
394 A model study, *Clim. Past*, 7(4), 1103–1122, doi:10.5194/cp-7-1103-2011, 2011.
- 395 Bar-Matthews, M., Ayalon, A., Gilmour, M., Matthews, A. and Hawkesworth, C. J.: Sea - land oxygen  
396 isotopic relationships from planktonic foraminifera and speleothems in the Eastern Mediterranean  
397 region and their implication for paleorainfall during interglacial intervals, *Geochim. Cosmochim. Acta*,  
398 67(17), 3181–3199, doi:10.1016/S0016-7037(02)01031-1, 2003.
- 399 Beaumet, J., Krinner, G., Déqué, M., Haarsma, R. and Li, L.: Assessing bias-corrections of oceanic  
400 surface conditions for atmospheric models, *Geosci. Model Dev. Discuss.*, (December), 1–29,  
401 doi:10.5194/gmd-2017-247, 2017.
- 402 Dee, D. P., Uppala, S. M., Simmons, A. J., Berrisford, P., Poli, P., Kobayashi, S., Andrae, U.,  
403 Balmaseda, M. A., Balsamo, G., Bauer, P., Bechtold, P., Beljaars, A. C. M., van de Berg, L., Bidlot, J.,  
404 Bormann, N., Delsol, C., Dragani, R., Fuentes, M., Geer, A. J., Haimberger, L., Healy, S. B., Hersbach,  
405 H., Hólm, E. V., Isaksen, I., Kållberg, P., Köhler, M., Matricardi, M., McNally, A. P., Monge-Sanz, B.  
406 M., Morcrette, J. J., Park, B. K., Peubey, C., de Rosnay, P., Tavolato, C., Thépaut, J. N. and Vitart, F.:  
407 The ERA-Interim reanalysis: Configuration and performance of the data assimilation system, *Q. J. R.*  
408 *Meteorol. Soc.*, 137(656), 553–597, doi:10.1002/qj.828, 2011.
- 409 Dormoy, I., Peyron, O., Combourieu Nebout, N., Goring, S., Kotthoff, U., Magny, M. and Pross, J.:  
410 Terrestrial climate variability and seasonality changes in the Mediterranean region between 15 000 and  
411 4000 years BP deduced from marine pollen records, *Clim. Past*, 5, 615–632, 2009.
- 412 Guiot, J.: Methodology of the last climatic cycle reconstruction in France from pollen data, *Palaeogeogr.*  
413 *Palaeoclimatol. Palaeoecol.*, 80(1), 49–69, doi:10.1016/0031-0182(90)90033-4, 1990.
- 414 Kallel, N., Paterne, M., Labeyrie, L., Duplessy, J. C. and Arnold, M.: Temperature and salinity records  
415 of the Tyrrhenian Sea during the last 18,000 years, *Palaeogeogr. Palaeoclimatol. Palaeoecol.*, 135(1–4),



416 97–108, doi:10.1016/S0031-0182(97)00021-7, 1997.

417 Kucera, M., Rohling, E. J., Hayes, A., Hopper, L. G. S., Kallel, N., Buongiorno Nardelli, B., Adloff, F.  
418 and Mikolajewicz, U.: Sea surface temperature of the Mediterranean Sea during the early Holocene  
419 insolation maximum, *Clim. Past*, 2011.

420 Locarnini, R. A., Mishonov, A. V., Antonov, J. I., Boyer, T. P., Garcia, H. E., Baranova, O. K., Zweng,  
421 M. M., Paver, C. R., Reagan, J. R., Johnson, D. R., Hamilton, M. and Seidov, D.: World Ocean Atlas  
422 2013, Volume 1: Temperature, NOAA Atlas., edited by S. Levitus and A. Mishonov., 2013.

423 Ludwig, W., Dumont, E., Meybeck, M. and Heussner, S.: River discharges of water and nutrients to the  
424 Mediterranean and Black Sea: Major drivers for ecosystem changes during past and future decades?,  
425 *Prog. Oceanogr.*, 80(3–4), 199–217, doi:10.1016/j.pocean.2009.02.001, 2009.

426 Magny, M., Combourieu-Nebout, N., De Beaulieu, J. L., Bout-Roumazeilles, V., Colombaroli, D.,  
427 Desprat, S., Francke, A., Joannin, S., Ortu, E., Peyron, O., Revel, M., Sadori, L., Siani, G., Sicre, M. A.,  
428 Samartin, S., Simonneau, A., Tinner, W., Vanni re, B., Wagner, B., Zanchetta, G., Anselmetti, F.,  
429 Brugiapaglia, E., Chapron, E., Debret, M., Desmet, M., Didier, J., Essallami, L., Galop, D., Gilli, A.,  
430 Haas, J. N., Kallel, N., Millet, L., Stock, A., Turon, J. L. and Wirth, S.: North-south palaeohydrological  
431 contrasts in the central mediterranean during the holocene: Tentative synthesis and working hypotheses,  
432 *Clim. Past*, 9(5), 2043–2071, doi:10.5194/cp-9-2043-2013, 2013.

433 Peyron, O., Goring, S., Dormoy, I., Kotthoff, U., Pross, J., de Beaulieu, J.-L., Drescher-Schneider, R.,  
434 Vanni re, B. and Magny, M.: Holocene seasonality changes in the central Mediterranean region  
435 reconstructed from the pollen sequences of Lake Accessa (Italy) and Tenaghi Philippon (Greece), *The*  
436 *Holocene*, 21(1), 131–146, doi:10.1177/0959683610384162, 2011.

437 Rohling, E. J.: Environmental control on Mediterranean salinity and  $\delta^{18}\text{O}$ , *Paleoceanography*, 14(6),  
438 706–715, doi:10.1029/1999PA900042, 1999.

439 Rohling, E. J.: Paleosalinity: Confidence limits and future applications, *Mar. Mar. Geol.*, 163, 1–11,  
440 doi:10.1016/S0025-3227(99)00097-3, 2000.

441 Vadsaria, T., Li, L., Ramstein, G., & Dutay, J.-C.: Model and output for Vadsaria et al, “Development  
442 of a sequential tool LMDZ-NEMO-med-V1 for global to regional past climate simulation over the  
443 Mediterranean basin: an early Holocene case study”, GMD publication. doi:[10.5281/zenodo.3258409](https://doi.org/10.5281/zenodo.3258409),  
444 2019.

445 Vorosmarty, C. J., Feteke, B. M. and Tucker, B. A.: Global River Discharge, 1807-1991, V. 1.1  
446 (RivDIS), 1998.

447
